# Supplementary material for: Circulating levels of cytokines, chemokines and growth factors in patients with achalasia
Source: PubMed Central journal article supplement (PMC8461322; doi:10.3892/br.2021.1468), 2021-09-10
Supplement: Supplementary_Data.pdf [file Supplementary_Data.pdf]

Table SI. Frequency of observations with unquantified analytes concentration below and above the LOQ along with the corresponding replaced values.

| Analyte        | LOQ<        |                | LOQ>       |                |
|----------------|-------------|----------------|------------|----------------|
|                | n (%)       | Replaced value | n (%)      | Replaced value |
| IL-1 $\beta$   | 1 (0.9)     | 0.711          | 0 (0.0)    | -              |
| IL-1Ra         | 0 (0.0)     | -              | 0 (0.0)    | -              |
| IL-2           | 7 (6.2)     | 2.808          | 0 (0.0)    | -              |
| IL-4           | 0 (0.0)     | -              | 0 (0.0)    | -              |
| IL-5           | 0 (0.0)     | -              | 0 (0.0)    | -              |
| IL-6           | 18 (15.9)   | 1.449          | 0 (0.0)    | -              |
| IL-7           | 2 (1.8)     | 5.796          | 0 (0.0)    | -              |
| IL-8           | 0 (0.0)     | -              | 0 (0.0)    | -              |
| IL-9           | 0 (0.0)     | -              | 0 (0.0)    | -              |
| IL-10          | 9 (8.0)     | 0.846          | 0 (0.0)    | -              |
| IL-12p70       | 62 (54.9)   | 1.125          | 0 (0.0)    | -              |
| IL-13          | 5 (4.4)     | 1.917          | 0 (0.0)    | -              |
| IL-15          | 50 (44.3)   | 47.720         | 0 (0.0)    | -              |
| IL-17          | 0 (0.0)     | -              | 0 (0.0)    | -              |
| Eotaxin        | 0 (0.0)     | -              | 0 (0.0)    | -              |
| FGF basic      | 0 (0.0)     | -              | 0 (0.0)    | -              |
| G-CSF          | 0 (0.0)     | -              | 0 (0.0)    | -              |
| GM-CSF         | 49 (43.4.0) | 0.585          | 0 (0.0)    | -              |
| IFN- $\gamma$  | 55 (48.7.0) | 1.080          | 0 (0.0)    | -              |
| IP-10          | 0 (0.0)     | -              | 0 (0.0)    | -              |
| MCP-1          | 0 (0.0)     | -              | 0 (0.0)    | -              |
| MIP-1 $\alpha$ | 0 (0.0)     | -              | 0 (0.0)    | -              |
| PDGF-BB        | 0 (0.0)     | -              | 0 (0.0)    | -              |
| MIP-1 $\beta$  | 0 (0.0)     | -              | 0 (0.0)    | -              |
| RANTES         | 0 (0.0)     | -              | 42 (37.2%) | 2,8206         |
| TNF- $\alpha$  | 0 (0.0)     | -              | 0 (0.0)    | -              |
| VEGF           | 27 (23.9.0) | 47.180         | 0 (0.0)    | -              |

LOQ, limit of quantification; LOQ<, observations with unquantified concentrations lower than the minimum detectable. Replaced values were calculated as 10% lower than the minimum observed value; LOQ>, observations with unquantified concentrations greater than the maximum detectable. Replaced values were calculated as 10% higher the maximum observed value.
